# Supplementary material for: Chemical stability and electrochemical characteristics of FeS microcrystals as the cathode material of rechargeable lithium batteries
Source: Royal Society of Chemistry journal article supplement (doi:10.1039/c5ta02048d), 2015-01-01
Supplement: c5ta02048d1.pdf [file c5ta02048d1.pdf]

## Chemical stability and electrochemical characteristics of FeS microcrystals as the cathode material of rechargeable lithium battery

Dat T. Tran<sup>a</sup> and Sheng S. Zhang<sup>a\*</sup>

<sup>a</sup>Energy and Power Division, Sensors and Electron Devices Directorate, U.S. Army Research Laboratory, Adelphi, MD 20783-1138, USA

Email (S.S. Zhang): [shengshui.zhang.civ@mail.mil](mailto:shengshui.zhang.civ@mail.mil); [shengshui@gmail.com](mailto:shengshui@gmail.com)

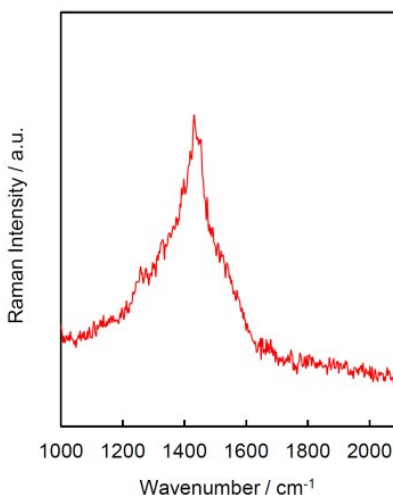

**Fig. S1** Raman spectrum of CP@FeS microcrystals. Result indicates that only carbon precursor was formed in the solvothermal pyrolysis of sucrose at 180 °C for 18 h.

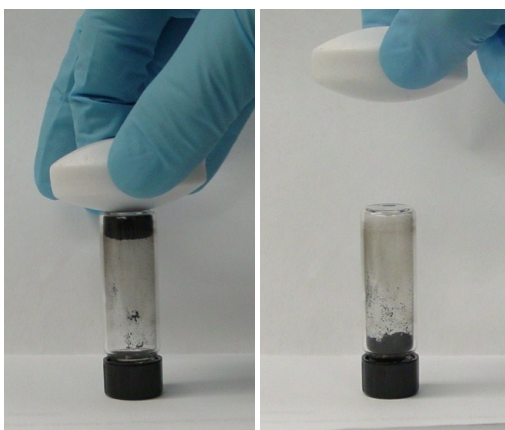

**Fig. S2** Magnetic property of the CP@FeS microcrystals after being stored in a sealed vial for 5 weeks. The pictures show that the CP@FeS powder can be picked up by a magnetic stirring bar, suggesting that nonmagnetic FeS was transformed to magnetic Fe<sub>3</sub>S<sub>4</sub>.
